# Supplementary material
Source: JCI journal article supplement (doi:10.1172/jci198032)

Fig. 1A

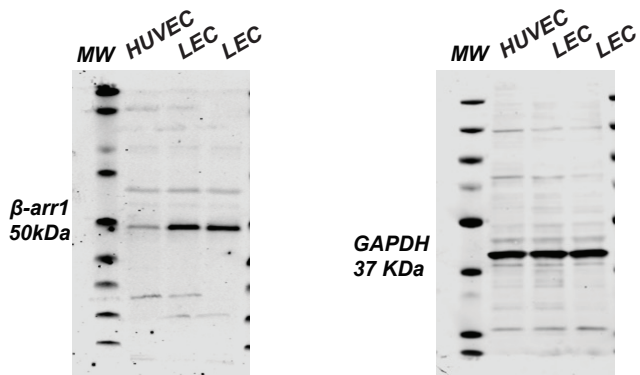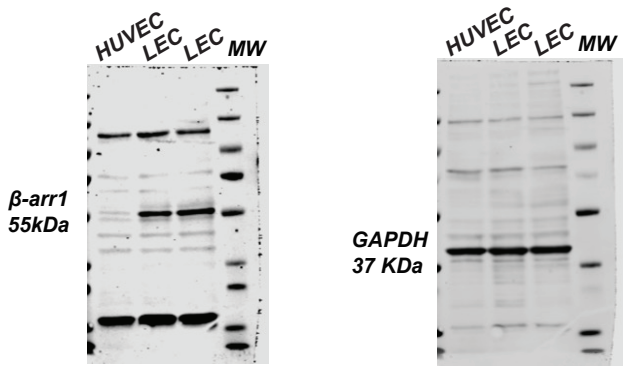

Fig. 2C

SRY genotyping: E15.5, *Arrb1/2<sup>ΔILEC</sup>* embryos

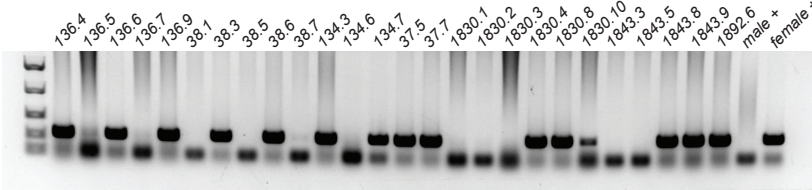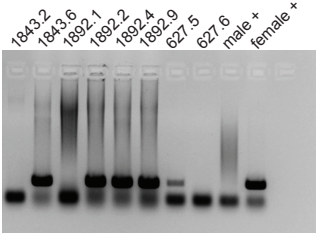

Fig. 4A

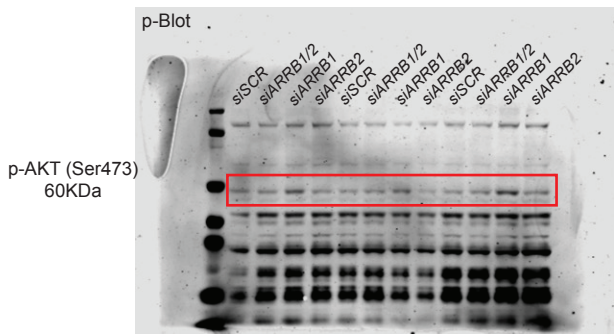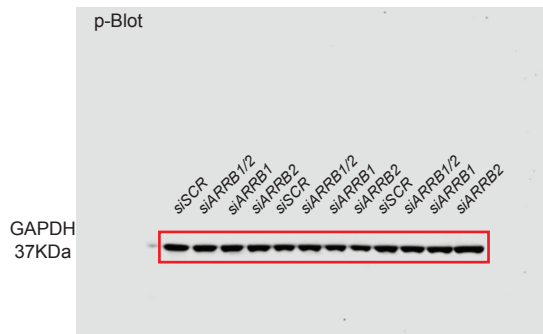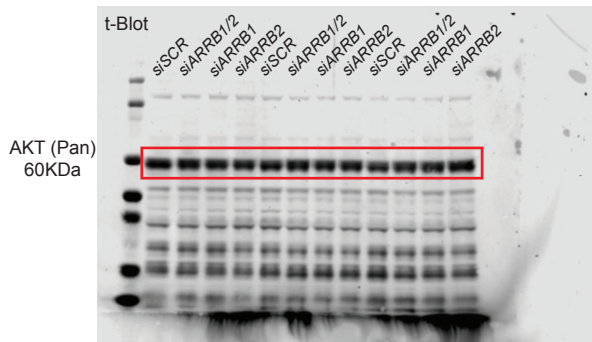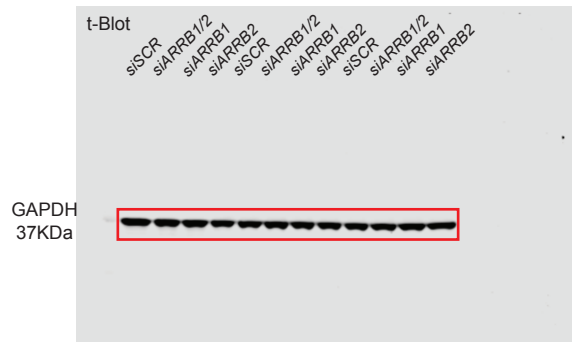

Fig. 4C

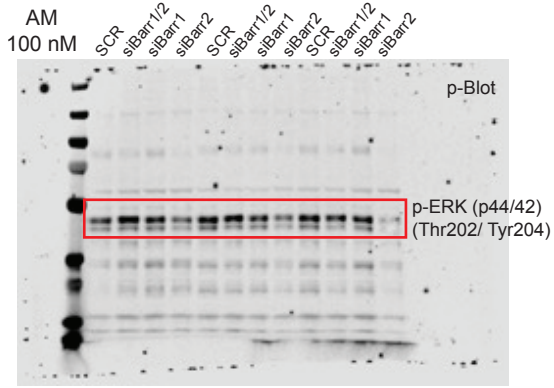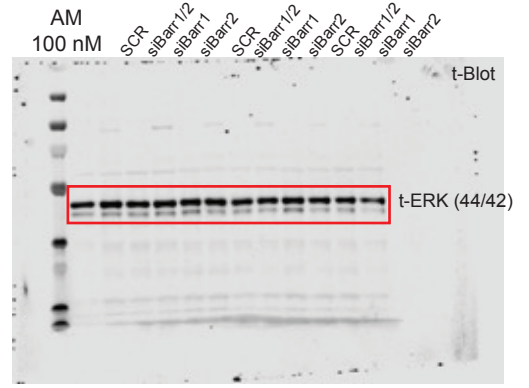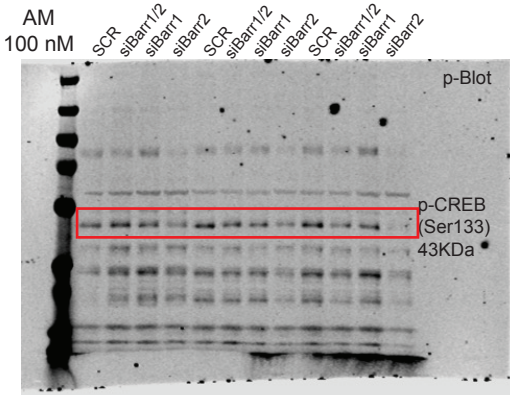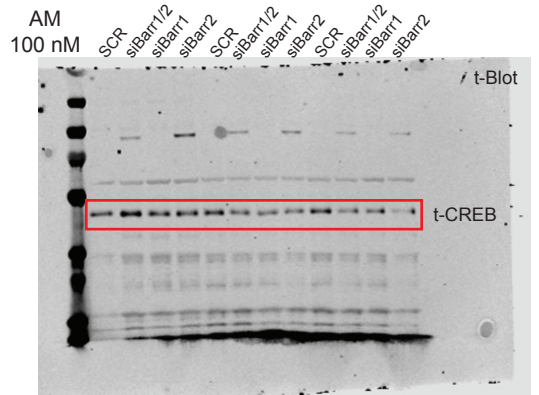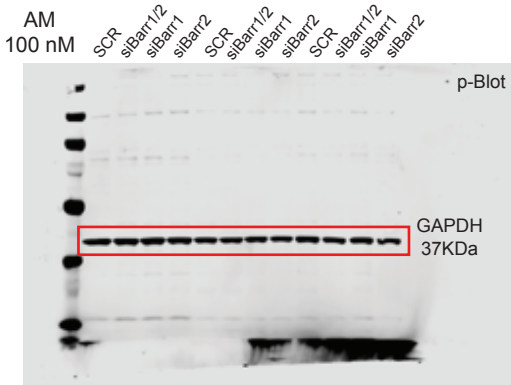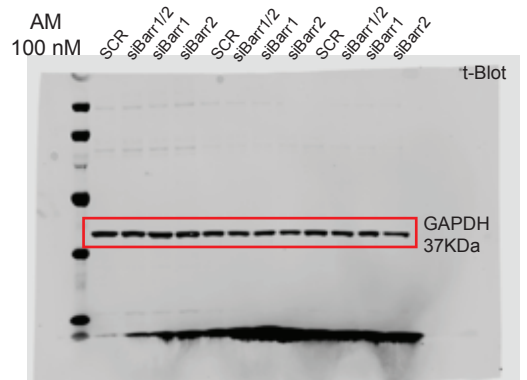

Fig. 6E

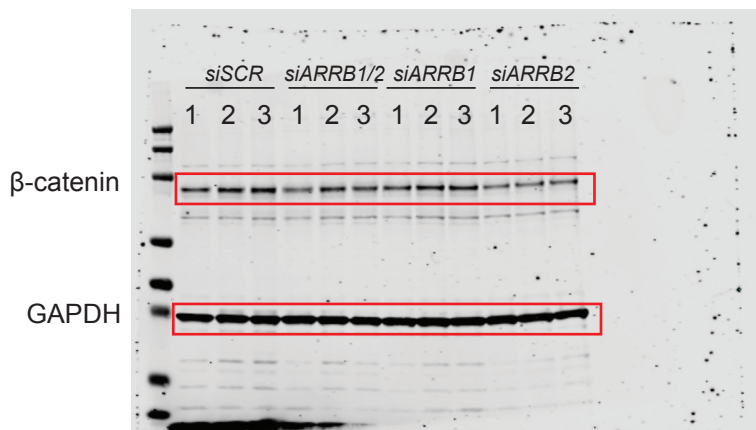

Supplement: sd2 [file 2]
